# Supplementary material
Source: PubMed Central journal article supplement (PMC4256133)
Supplement: NIHMS601890-supplement-Supp_FigureS1-S2.pdf [file NIHMS601890-supplement-Supp_FigureS1-S2.pdf]

## SUPPLEMENTARY INFORMATION (SI)

**Figure S1** The FsPP molecules from EcOPPs (green) and ScGGPPs (yellow) and the distance and rotation degree were calculated and shown.

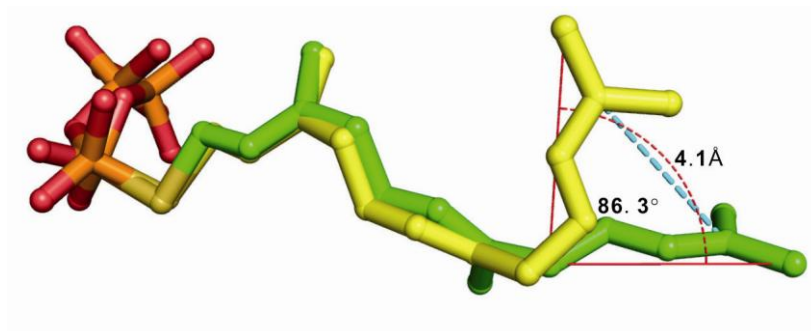

Figure S1

**Figure S2** The calculated cavities used POCASA 1.0 for EcOPPs (Figure S2A) and TmOPPs (Figure S2B).

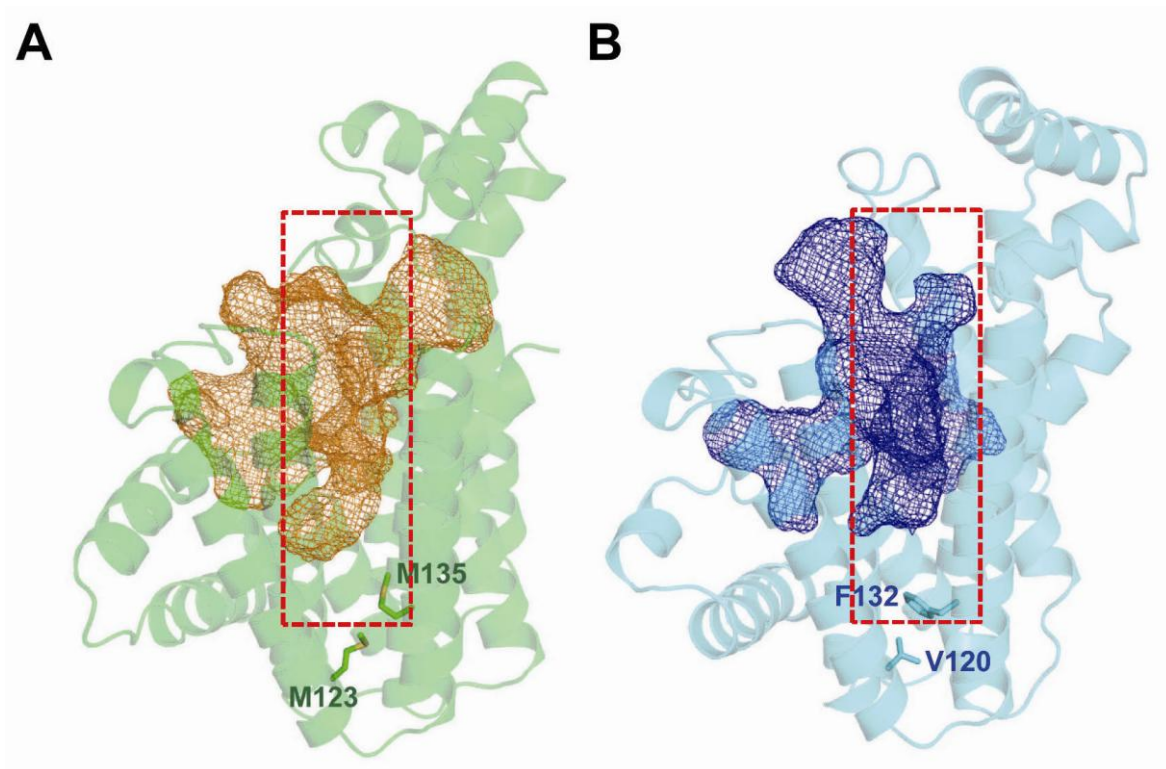

Figure S2
